# Supplementary material for: Using Topological Data Analysis (TDA) and Persistent Homology to Analyze the Stock Markets in Singapore and Taiwan
Source: Frontiers journal article supplement (doi:10.3389/fphy.2021.572216), 2021-03-04
Supplement: Data_Sheet_2.pdf [file Data_Sheet_2.pdf]

## Appendix

### A.1 TDA terminology and definitions.

Before introducing barcodes, we need to first know about homology groups, at least in terms of their operational definitions. For more mathematically-oriented readers, we recommend alternative references [11, 14-17, 62]. For this paper, it is enough to know that after obtaining a simplicial complex from a filtration process, we can get the homology groups with a few more operations. To understand these additional steps, some terms need to be defined. The first term is called the *n-chain*, the largest subset of *n*-dimensional simplices. For example, suppose we are given a simplicial complex  $\Sigma = \{\{i\}, \{j\}, \{k\}, \{l\}, \{i, j\}, \{j, k\}, \{k, l\}, \{k, i\}, \{l, j\}, \{i, j, k\}\}$ . We refer to sets containing just one entity as nodes, those comprising two entities as links, and those with three entities as faces, etc. In this example, the 2-chain is  $\{i, j, k\}$ , whereas the 1-chain is  $\{\{i, j\}, \{j, k\}, \{k, l\}, \{k, i\}, \{l, j\}\}$ . Thus, a *n-chain* can be understood as a way to sort out sets consisting of *n*-dimensional simplices only. Next, we can convert the *n-chain* to its *n-chain group*  $C_n(\Sigma)$ , which is  $C_n(\Sigma) = \sum \alpha_i \sigma_i$ , where  $\alpha_i$  is the *i*th coefficient that can be defined in terms of groups, e.g. a cyclic group  $\mathbb{Z}_2$  will have  $\alpha_i = 0$  or  $1$  only.  $\sigma_i$  is the *i*th simplex in  $C_n(\Sigma)$ .

Next, we introduce a few more terms, that are *chain complexes*, *boundary* (or boundary operator), *kernel*, and *image*. The boundary operator  $\partial$  can operate on an *n*-simplex  $X$ , or  $\partial(X) = \sum_{k=1}^n (-1)^k [N_1, N_2, \dots, \widehat{N_k}, \dots, N_n]$ , where  $\widehat{N_k}$  is a node removed from  $X$ . Hereafter, we shall acronym the *n-chain group*  $C_n(\Sigma)$  as  $C_n$ , and acronym  $\partial(C_n(\Sigma))$  as  $\partial_n(\Sigma)$ . The kernel of  $\partial_n(\Sigma)$  is defined as finding an *n-chain*  $Z_n \subseteq C_n$ , which satisfy  $\partial(Z_n) = 0$ . The image of a boundary  $\partial_n(\Sigma)$  can then be written as  $\text{Im } \partial_n(\Sigma)$ , which gives the sets of boundaries. Finally, after introducing these four terms, we are now able to give a formal definition to the *n*th homology group of  $\Sigma$ :

$$H_n(\Sigma) := \text{Ker } \partial_n(\Sigma) / \text{Im } \partial_{n+1}(\Sigma),$$

where  $\partial_n$ , and  $\partial_{n+1}$  operating on  $\Sigma$  can be translated into the boundary operator operating on the *n-chain* and the *n + 1-chain* group of  $\Sigma$ .  $H_n(\Sigma)$  thus satisfy all the properties that can be defined as a group in group theory, i.e. associativity, the identity element, and the inverse element, which is very convenient in understanding topology using group theory's language as well as performing group operations. Also, Betti numbers can be defined as the dimension of  $H_n(\Sigma)$  or

$$\beta_n(\Sigma) = \dim(H_n(\Sigma)).$$

In this sense, if the homology group is a reducible representation of the data, then Betti numbers are the dimensions of the irreducible representation of the same homology group.

## A2. $p$ th Wasserstein distance

Suppose we have two persistence landscapes constructed using different data set in different periods, and we would like to scrutinize their differences. One of the effective approaches is resorting to the Wasserstein distances. Suppose now we have two simplicial complexes  $\Sigma_1$ , and  $\Sigma_2$ , where their Wasserstein distances can be defined as:

$$W_p(P_k^1, P_k^2) := \inf_{\phi} \left[ \sum_{x \in P_k^1} \|x - \phi(x)\|_{\infty}^p \right]^{\frac{1}{p}},$$

where  $W_p$  is the  $p$ th Wasserstein distance,  $P_k^1, P_k^2$  are two of the persistence diagrams corresponding to  $\Sigma_1$ , and  $\Sigma_2$  in the  $k$ th dimension;  $\phi(x)$  is a bijective function that generates the points in  $P_k^2$ , and  $\|\cdot\|_{\infty}$  denotes the sup norm. For  $p = 1$ , and 2, we have the *Manhattan distance*, and *Euclidean distance*, respectively by using the  $\ell^p$ -norm definition, whereas if  $p = \infty$ , we use the  $\ell^{\infty}$ -norm, which is the supremum over the points  $x$  instead to arrive at a *bottleneck distance*. By choosing appropriate  $p$  orders, we can differentiate the metrical differences of the two persistence diagrams.

## A3.

Figure A1, and Figure A2 and are too large, therefore we put them here for the reader's convenience.

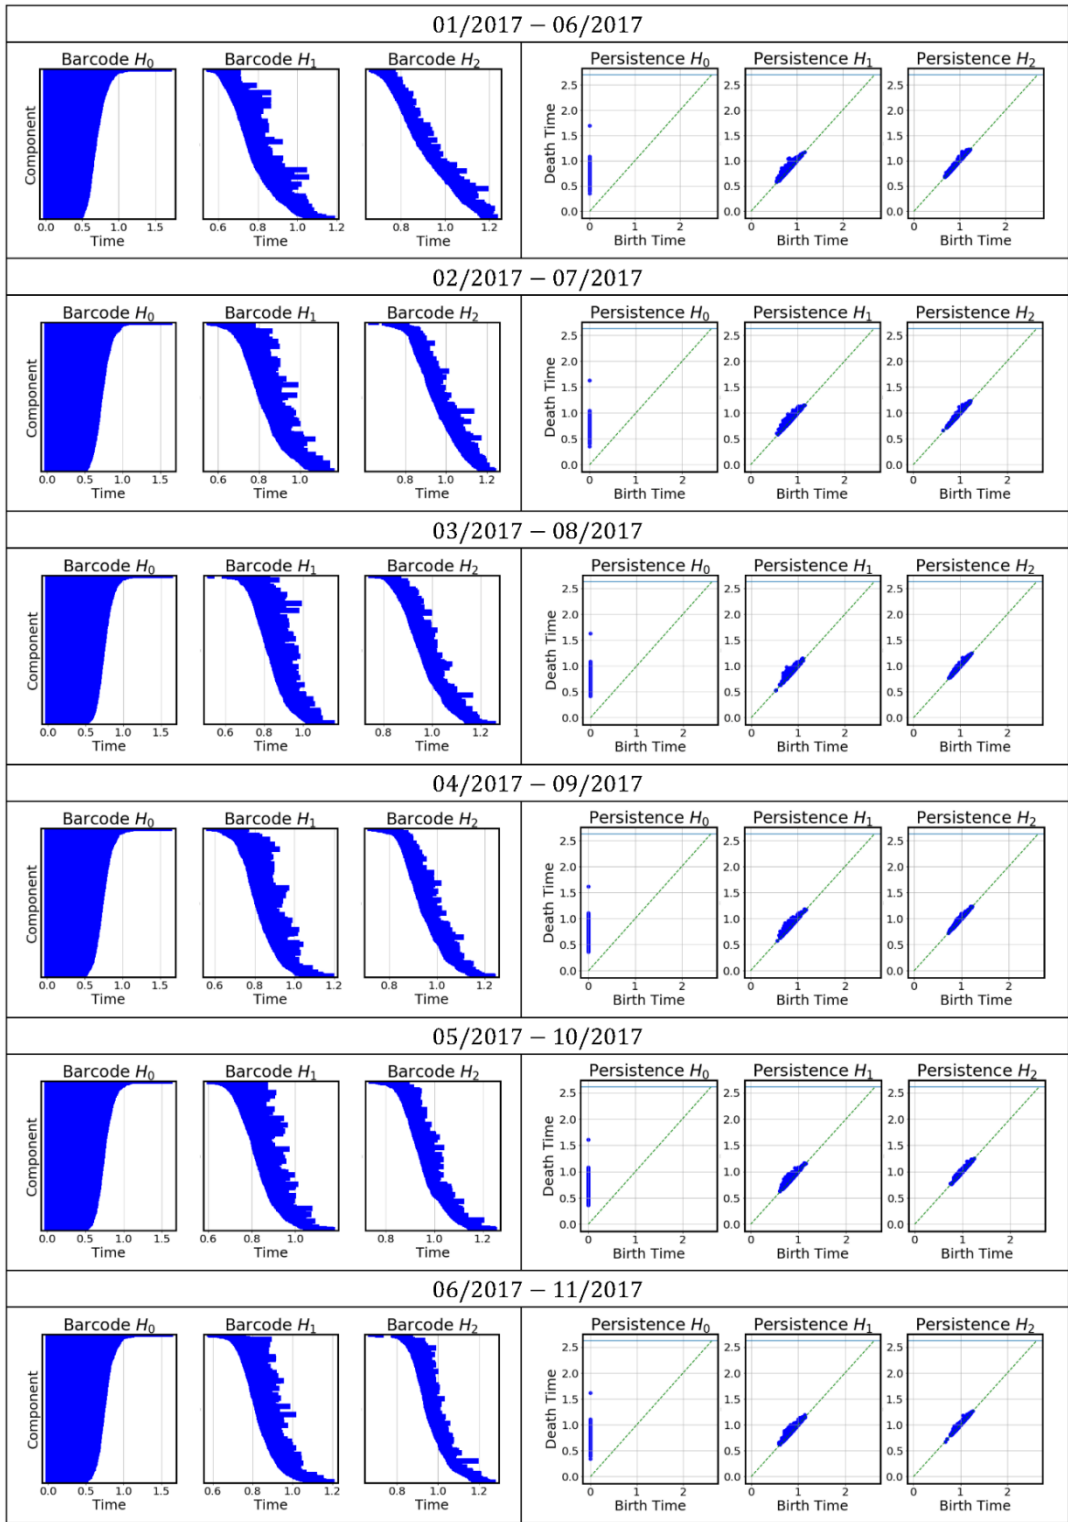

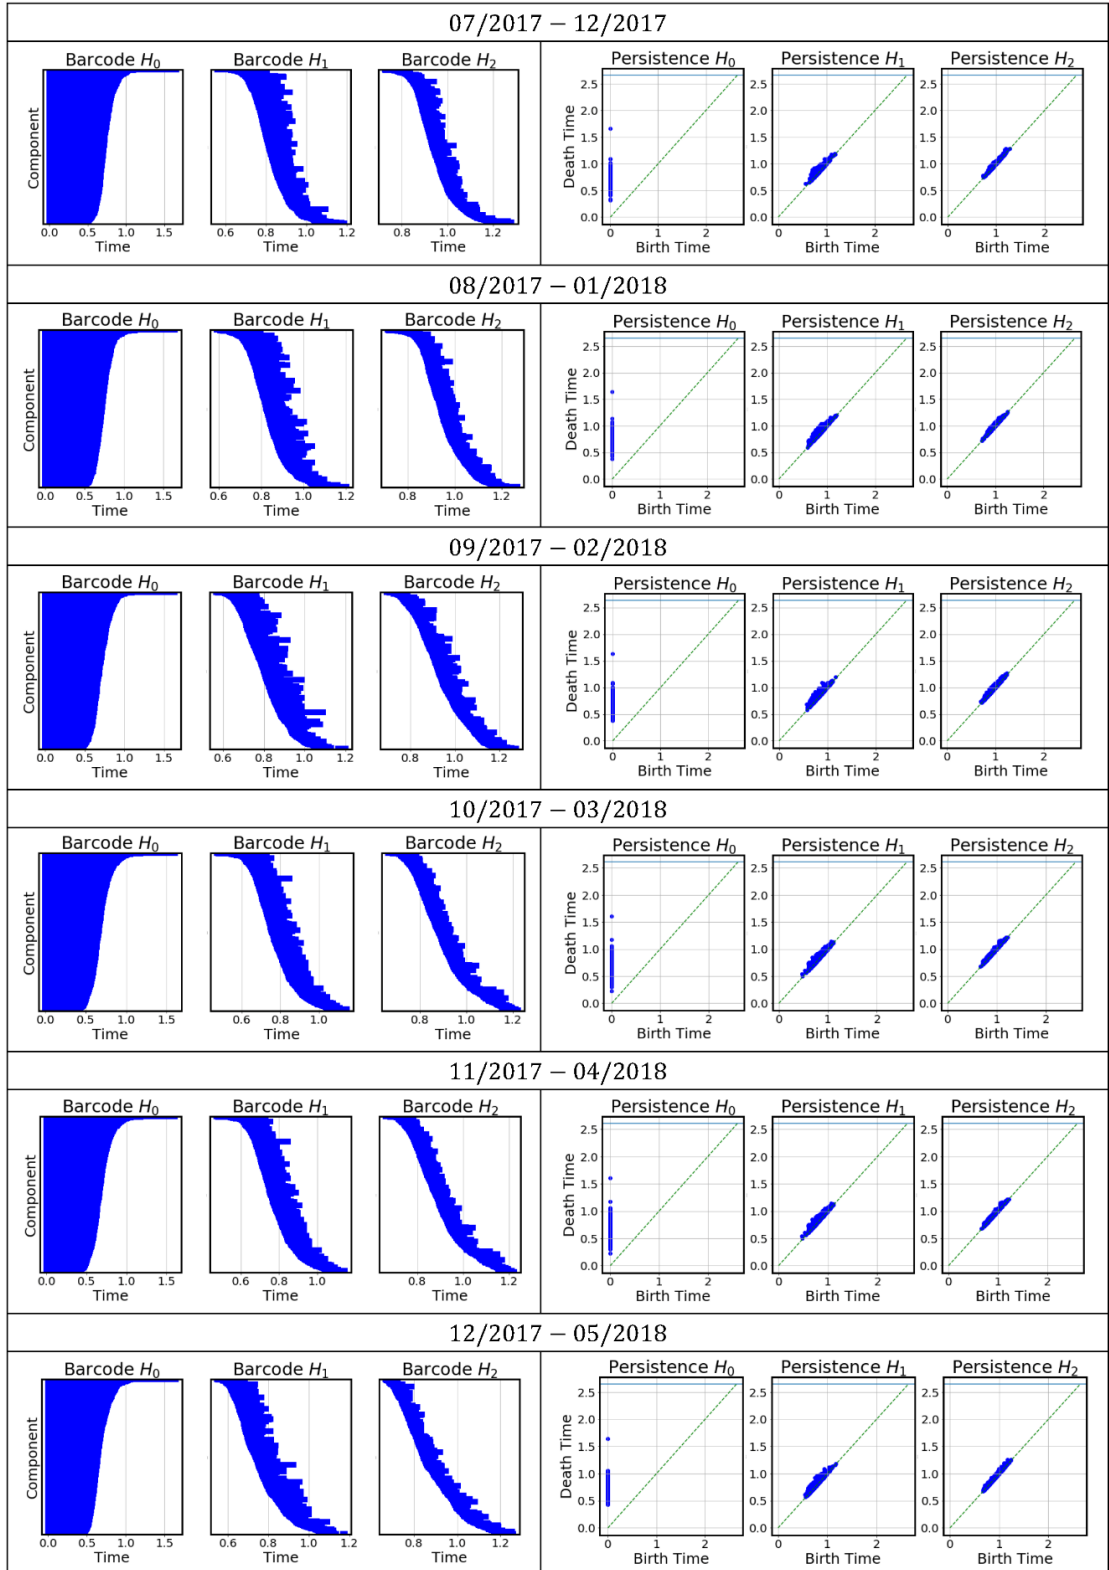

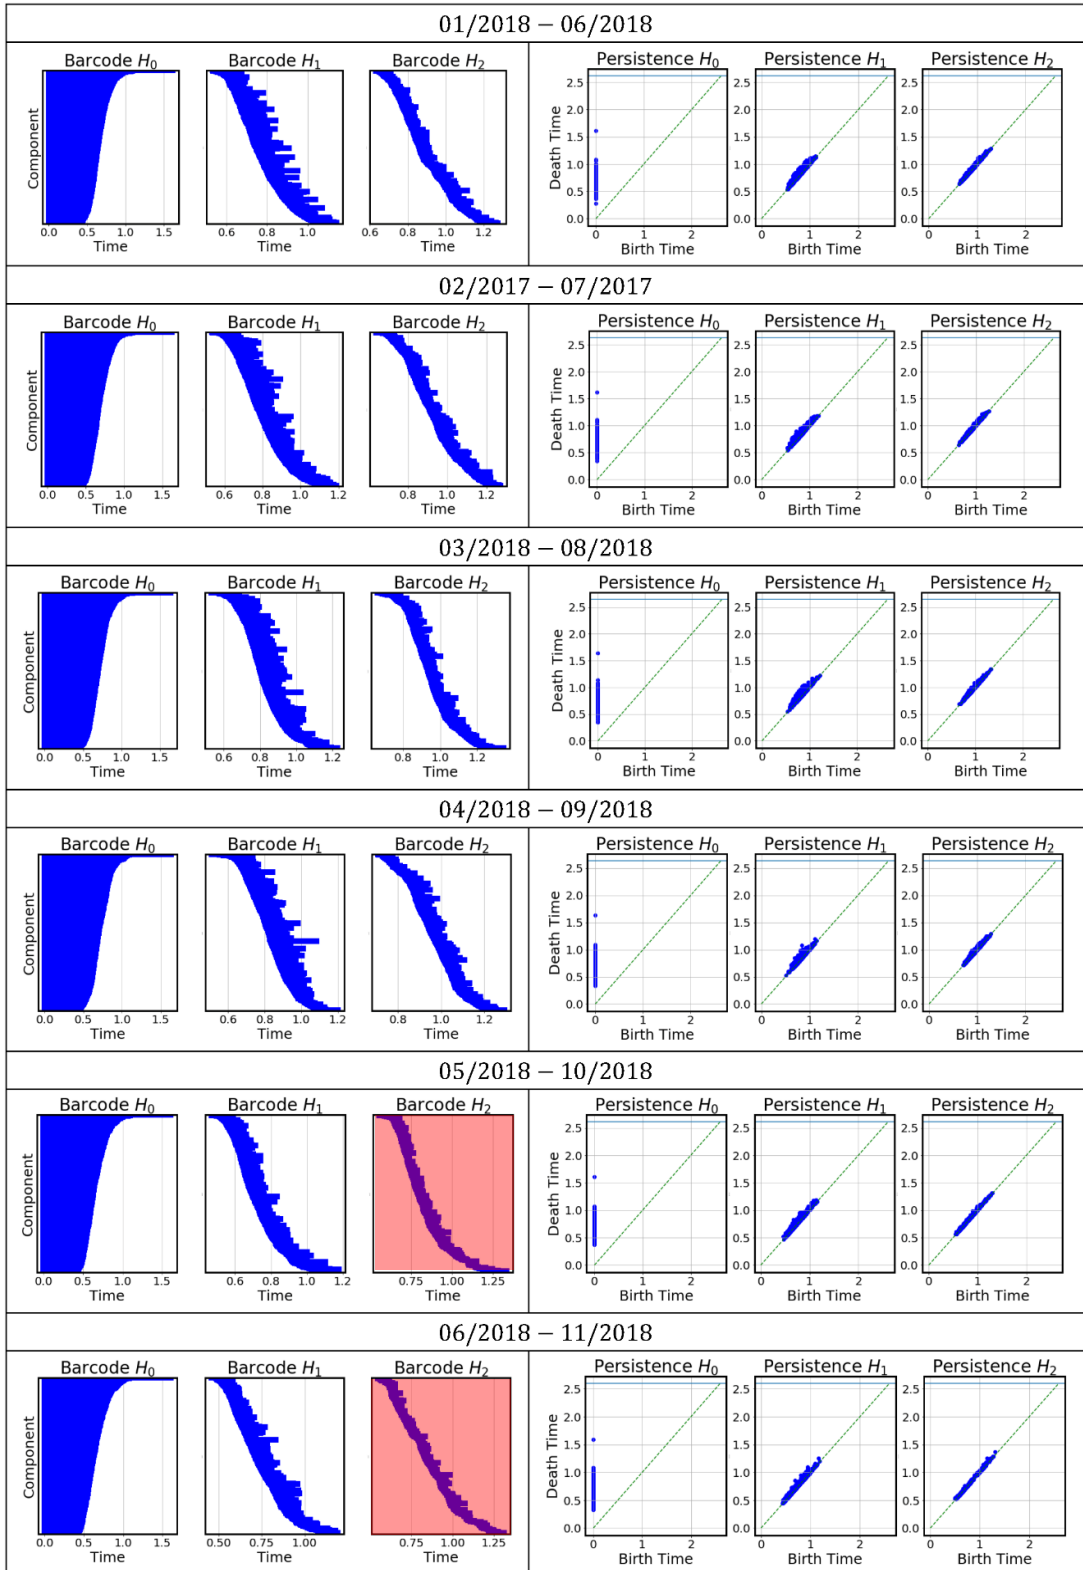

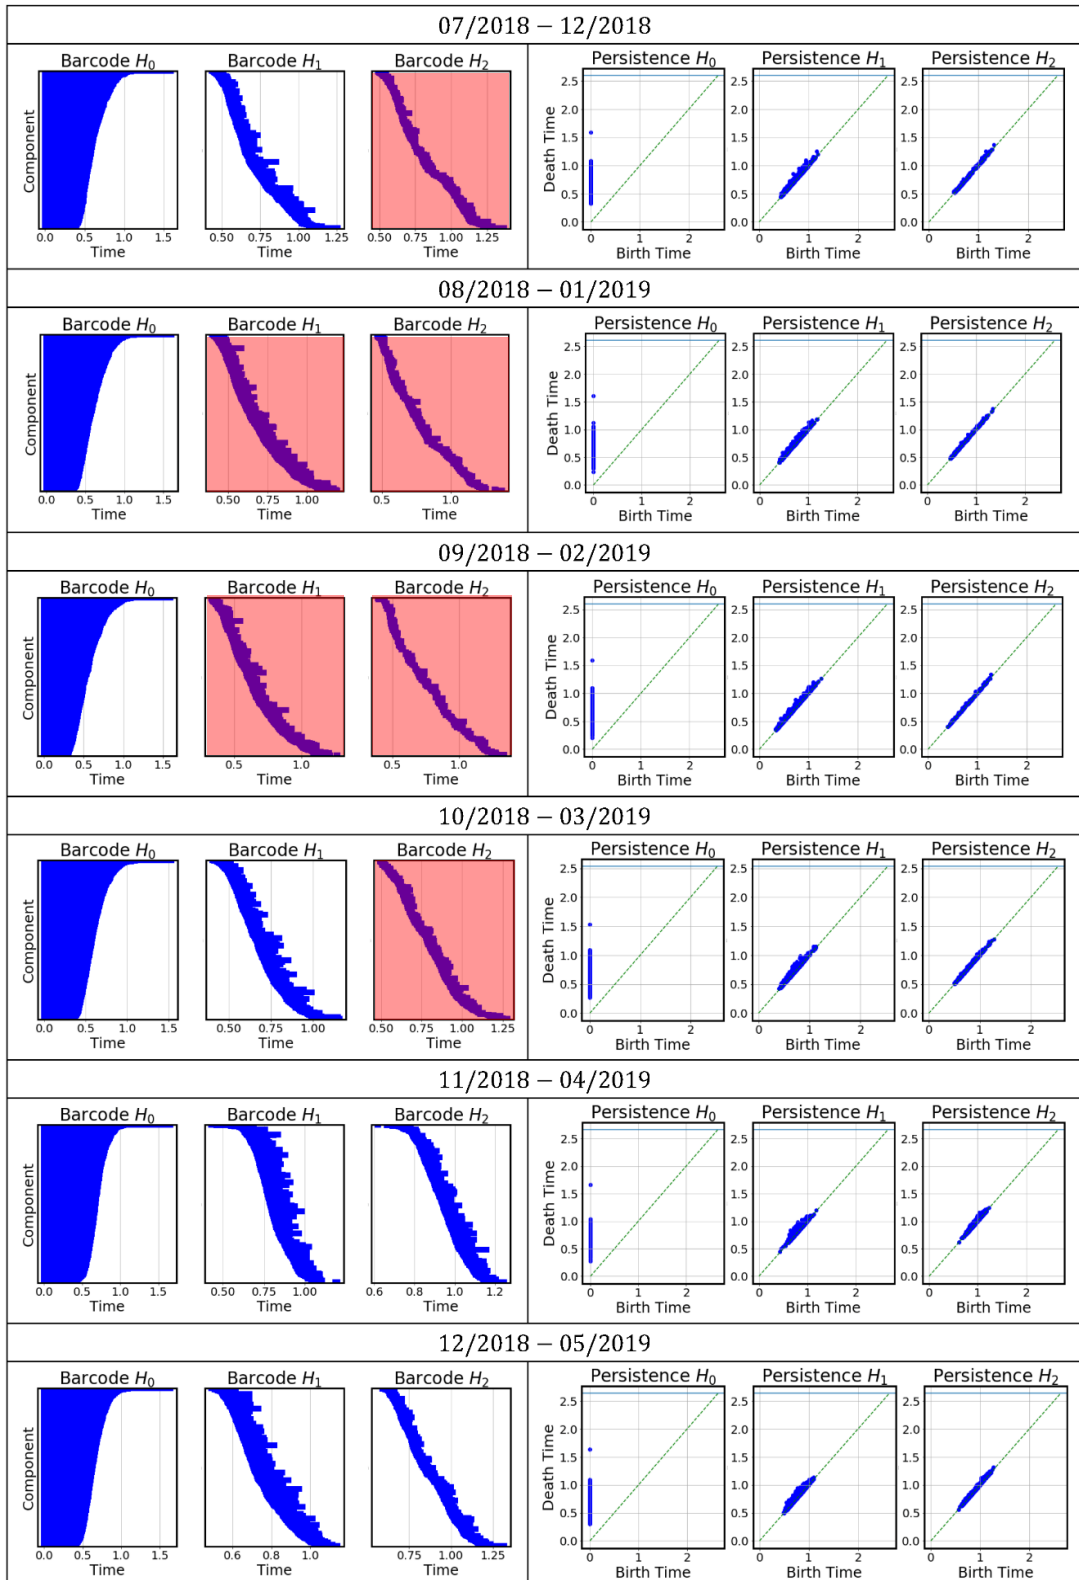

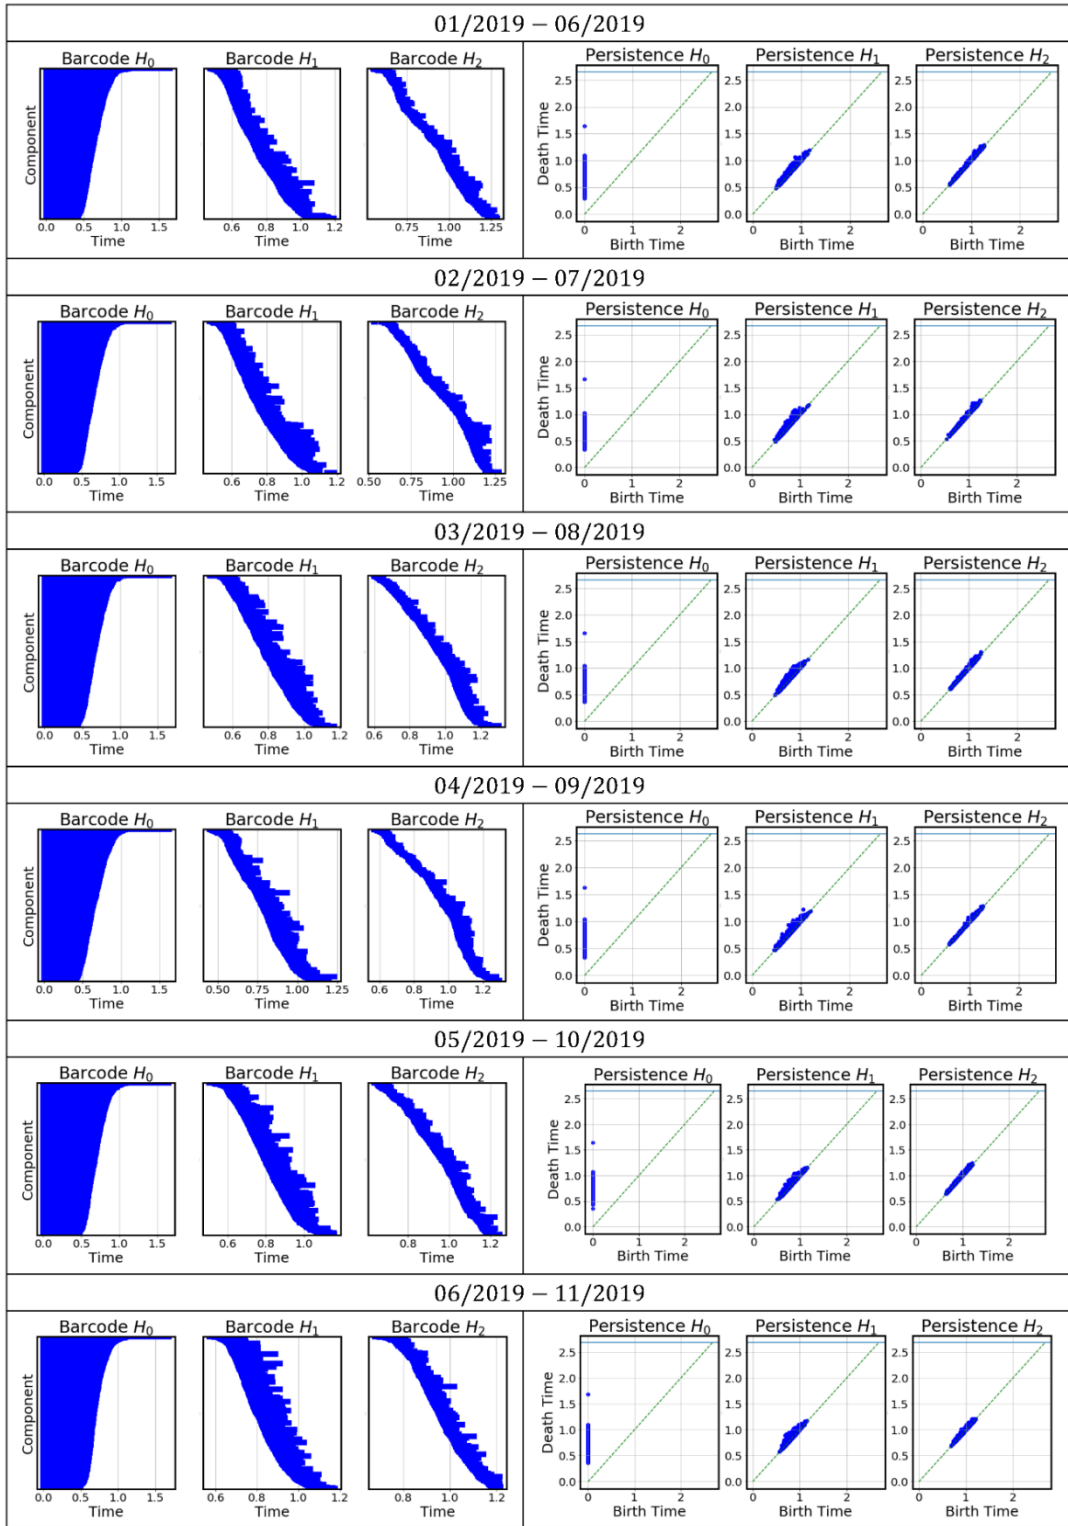

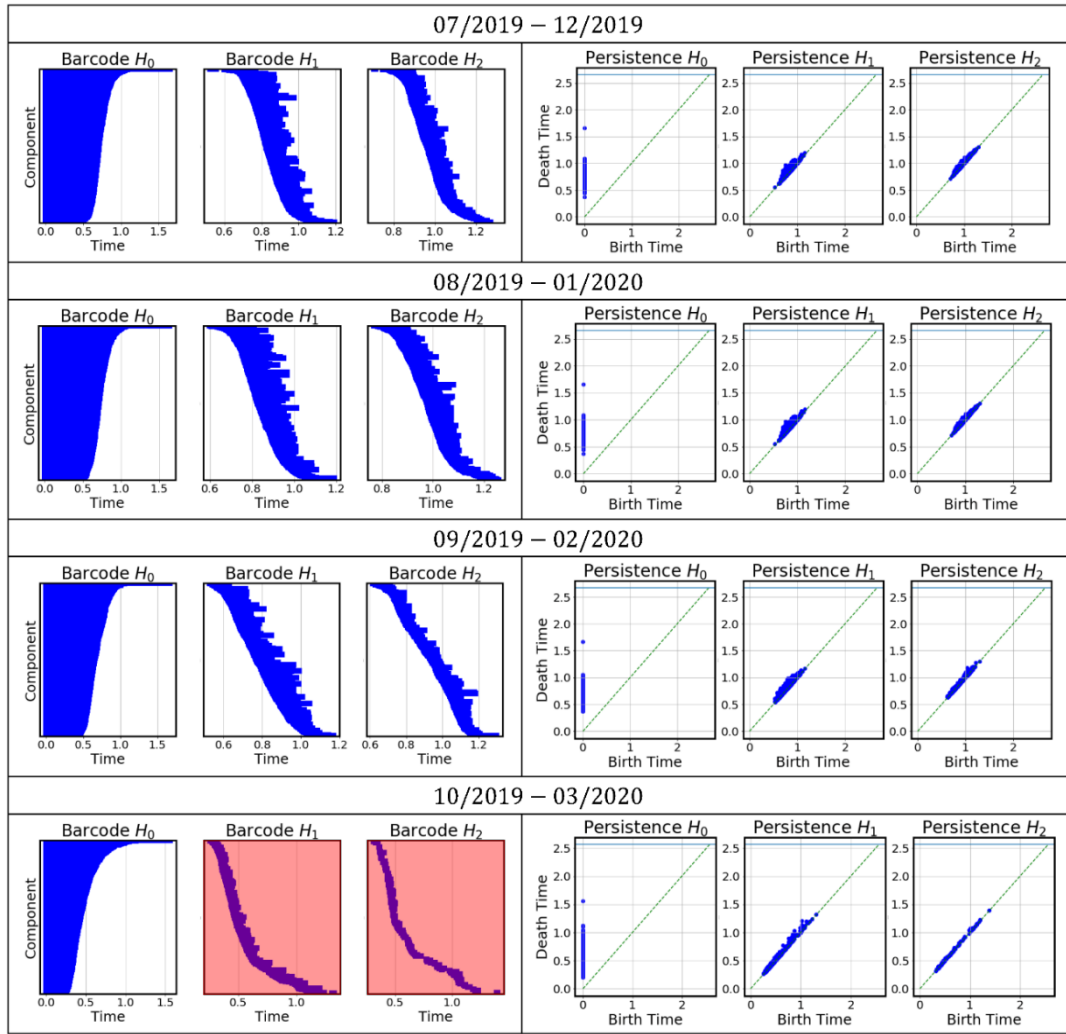

Figure A1. The barcodes and corresponding persistence diagrams for TAIEX, from Jan 2017 to Mar 2020. We use red-shade windows to indicate the barcodes that become less persistent during market crashes.



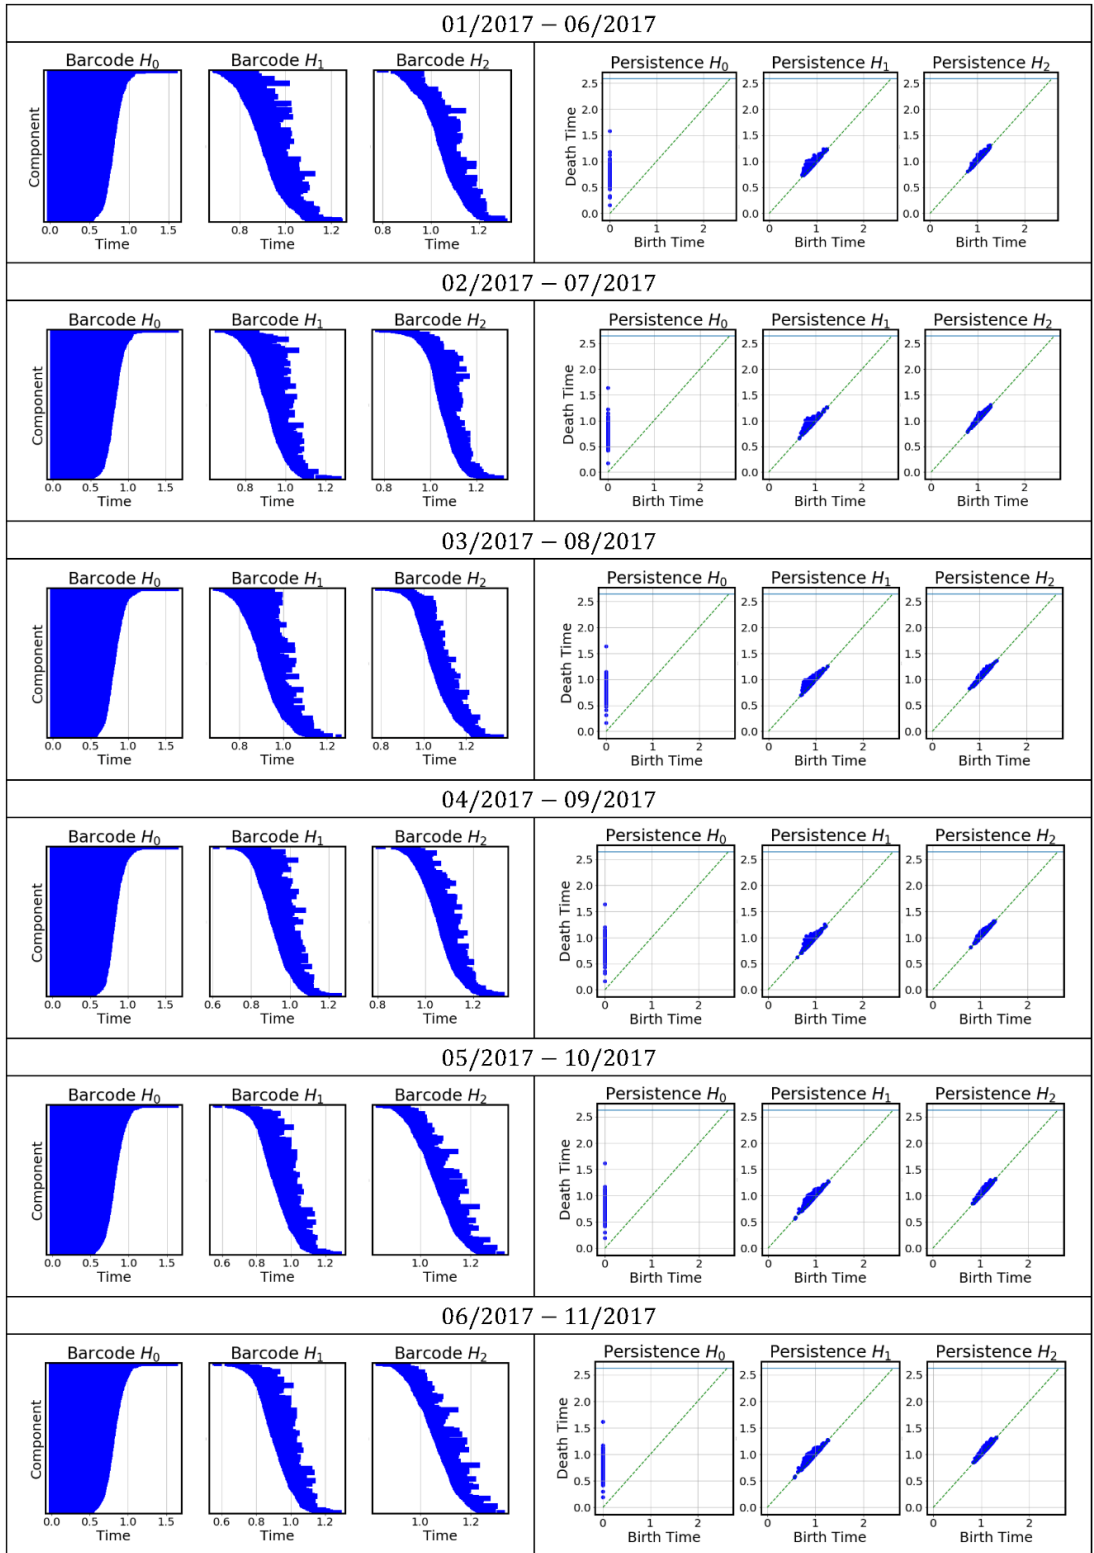

07/2017 – 12/2017

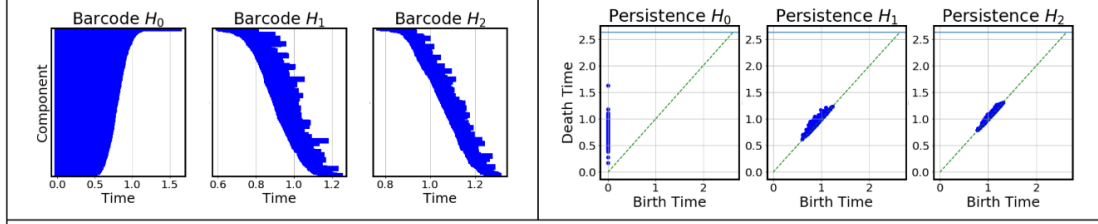

08/2017 – 01/2018

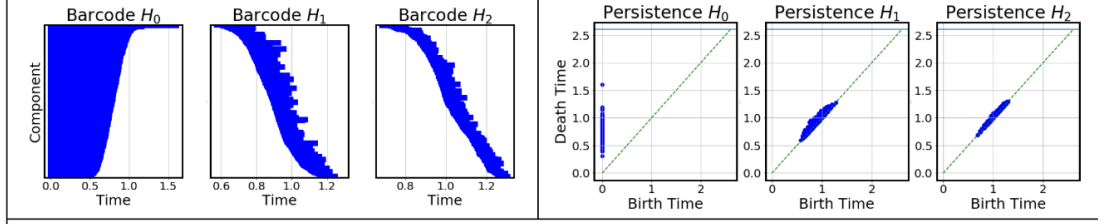

09/2017 – 02/2018

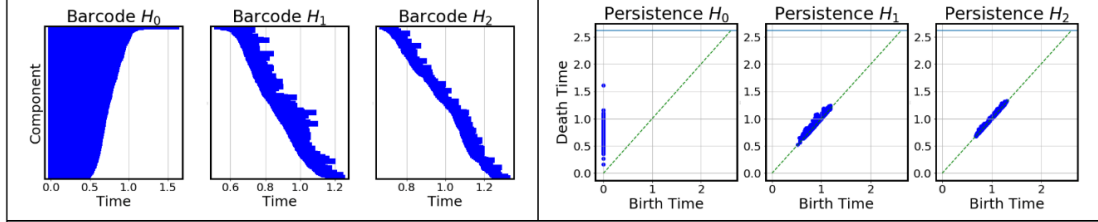

10/2017 – 03/2018

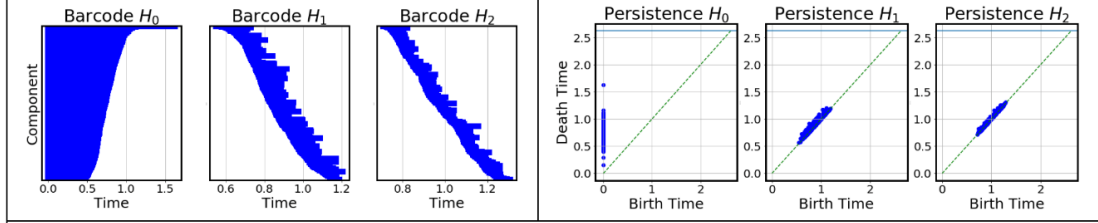

11/2017 – 04/2018

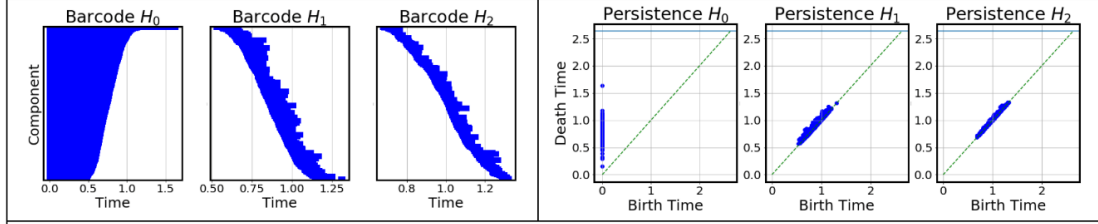

12/2017 – 05/2018

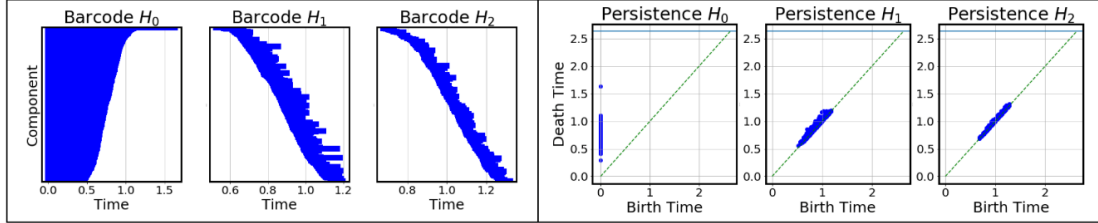

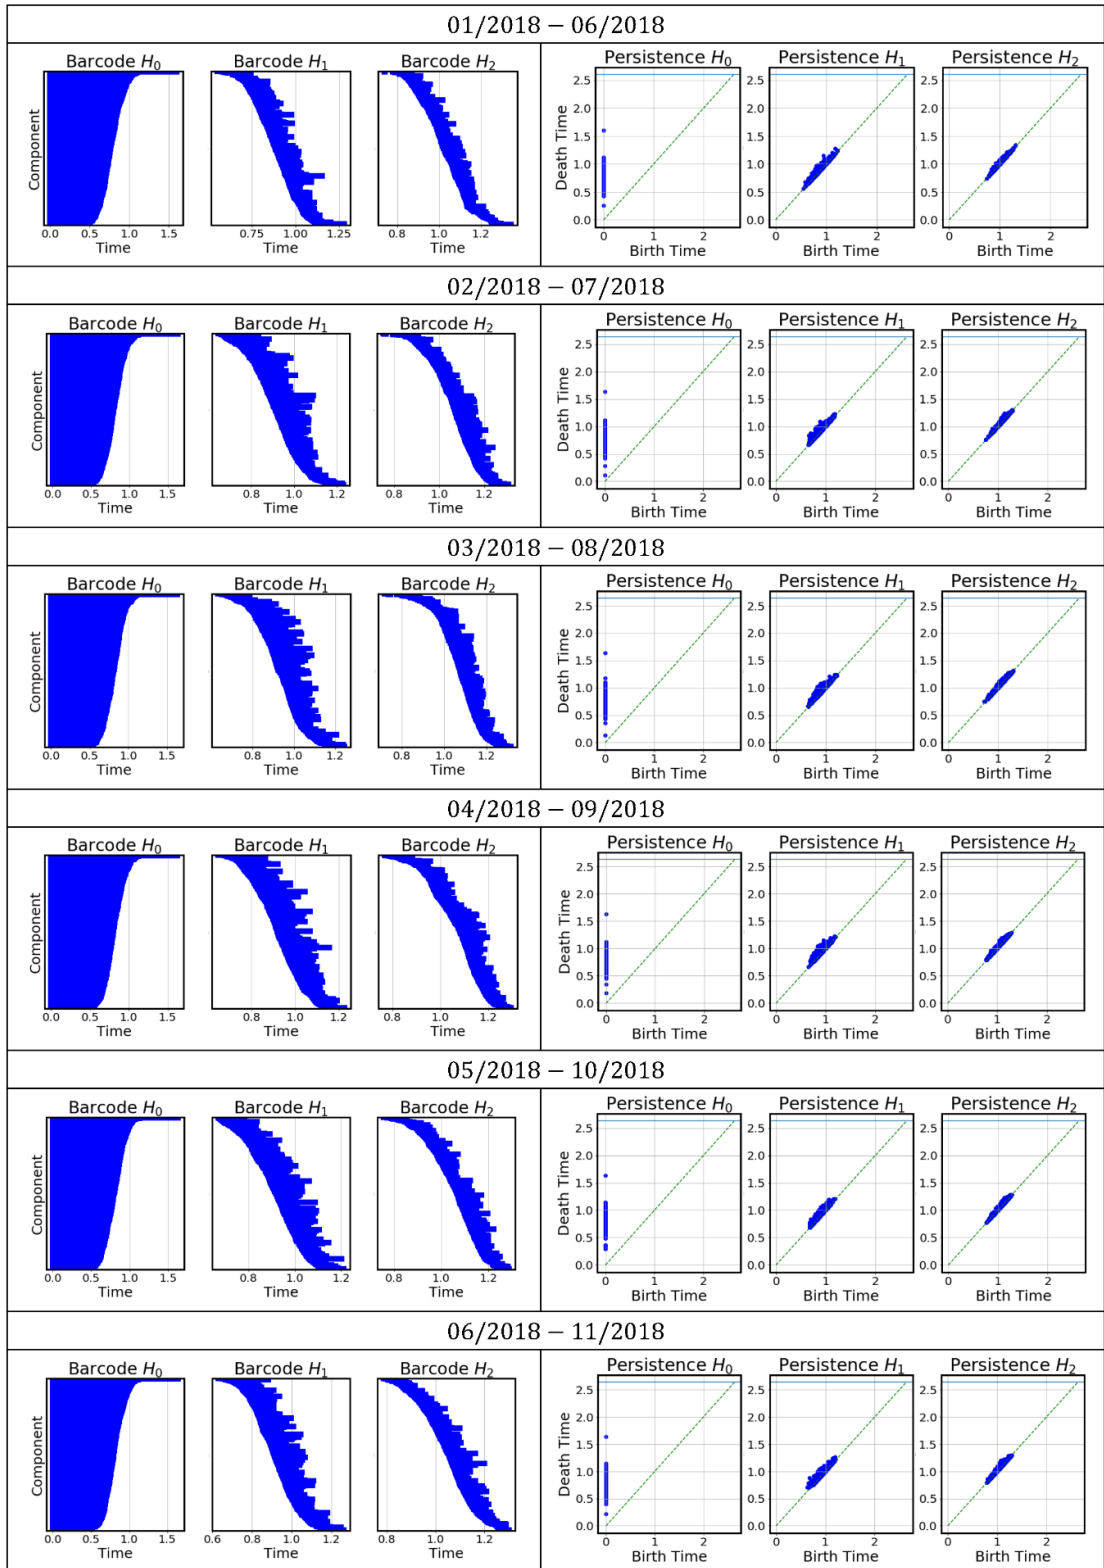

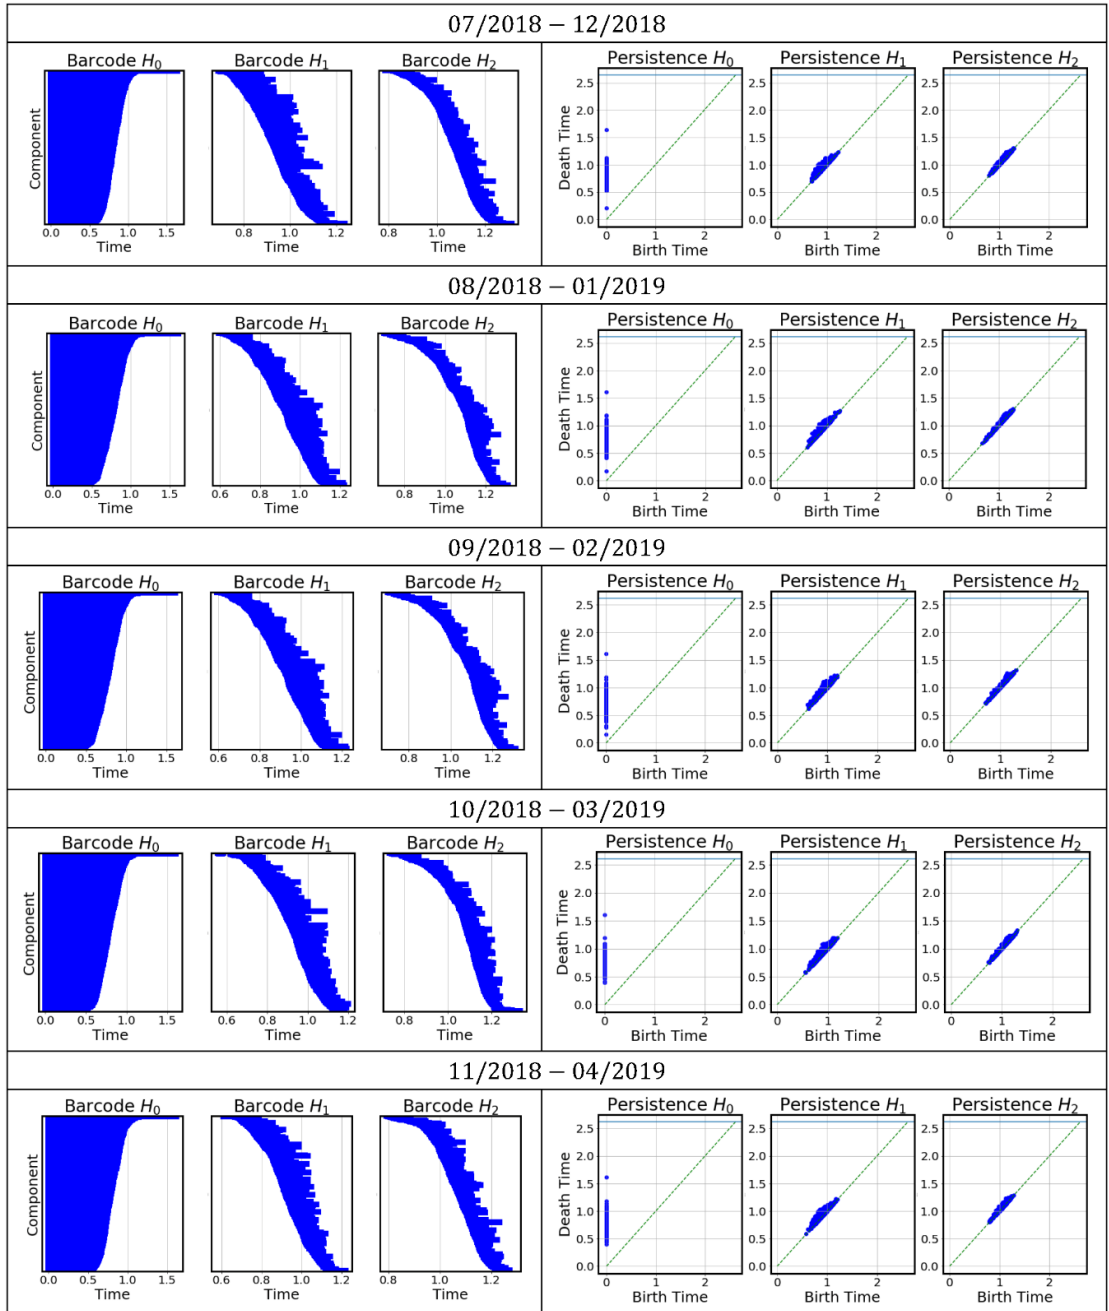

Figure A2 The barcodes and corresponding persistence diagrams for STI, from Jan 2017 to Apr 2019.
